# Supplementary material for: Validation of myocardial infarction diagnosis in patients with congenital heart disease in Sweden
Source: PubMed Central journal article supplement (PMC7584083; doi:10.1186/s12872-020-01737-1), 2020-10-23
Supplement: 12872_2020_1737_MOESM1_ESM.pdf [file 12872_2020_1737_MOESM1_ESM.pdf]

**600** patients randomly selected from the Swedish National Patient Register and/or Cause of Death Register with congenital heart and vascular disease diagnoses and diagnoses of myocardial infarction and/or stable/unstable angina pectoris

**351** patients whose medical records were not requested  
**93** no congenital heart disease diagnosis  
**221** only angina pectoris (stable/unstable)  
**33** myocardial infarction not primary diagnosis in the hospital discharge register  
**4** not requested for administrative reasons

**249** patients with congenital heart disease and myocardial infarction diagnoses whose medical records were requested
